# Supplementary material
Source: Springer Nature journal article supplement (https://www.springermedizin.de/resource/supplementary/12879_2011_2197_MOESM7_ESM.pdf/9443664)

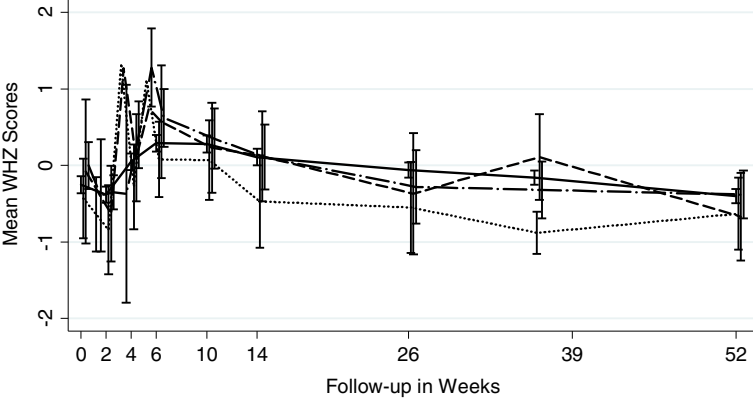

— HIV Negative

..... HIV Infected at Birth

- - - HIV Infected within 6 Weeks

- · - · HIV Infected after 6 Weeks

Supplement: MOESM7 [file 9443664]
